# Supplementary material for: Serum insulin‐like growth factor‐I levels are associated with improved white matter recovery after traumatic brain injury
Source: PubMed Central journal article supplement (PMC5601275; doi:10.1002/ana.24971), 2017-07-25
Supplement: ANA-82-30-s001.pdf [file ANA-82-30-s001.pdf]

## **SUPPLEMENTARY INFORMATION**

### **Serum IGF-I levels are associated with improved white matter recovery after TBI**

Feeney C, Sharp DJ, Hellyer PJ, Jolly AE, Cole JH, Scott G, Baxter D, Jilka S, Ross E, Ham TE, Jenkins PO, Li LM, Gorgoraptis N, Midwinter M, Goldstone AP

## **SUPPLEMENTARY TABLES**

Supplementary Table 1. Age-related reference ranges for serum IGF-I assay

Supplementary Table 2. Patient characteristics by GH deficiency status

Supplementary Table 3. Neuropsychological outcome measures in patients after TBI at baseline and recovery over time by IGF-I status.

**Supplementary Table 1. Age-related reference ranges for serum IGF-I assay**

| <b>Age<br/>yr</b> | <b>IGF-I median<br/>nmol/L</b> | <b>IGF-I lower<br/>nmol/L</b> | <b>IGF-I upper<br/>nmol/L</b> |
|-------------------|--------------------------------|-------------------------------|-------------------------------|
| 18                | 40.0                           | 21.2                          | 75.9                          |
| 19                | 33.9                           | 18.3                          | 62.8                          |
| 20                | 30.2                           | 16.5                          | 55.1                          |
| 21-25             | 26.4                           | 15.1                          | 46.5                          |
| 26-30             | 25.5                           | 15.2                          | 42.8                          |
| 31-35             | 24.4                           | 15.0                          | 39.9                          |
| 36-40             | 22.9                           | 14.2                          | 36.9                          |
| 41-45             | 21.3                           | 13.1                          | 34.7                          |
| 46-50             | 20.0                           | 12.2                          | 32.8                          |
| 51-55             | 18.7                           | 11.3                          | 30.9                          |
| 56-60             | 17.6                           | 10.5                          | 29.3                          |
| 61-65             | 16.4                           | 9.8                           | 27.6                          |
| 66-70             | 15.3                           | 9.0                           | 26.0                          |
| 71-75             | 14.3                           | 8.3                           | 24.4                          |
| 76-80             | 13.3                           | 7.7                           | 23.0                          |
| 81-90             | 12.4                           | 7.2                           | 21.6                          |

Median, lower (<5% CI) and upper (>95% CI) values normal range for serum IGF-I assay (Immulin 2500) from Dept. of Biochemistry, University College London Hospital, London, UK. To convert nmol/L to ng/mL divide by 0.131.

Supplementary Table 2. Patient characteristics by GH deficiency status

|                                               | All               | No GHD            | With GHD          | P with vs. without GHD <sup>a</sup> |
|-----------------------------------------------|-------------------|-------------------|-------------------|-------------------------------------|
| n                                             | 39                | 35                | 4                 |                                     |
| <b>Age at first scan (yrs)</b>                | 30.5 [24.5, 47.0] | 30.4 [24.1, 49.2] | 39.4 [29.7, 44.4] | 0.50                                |
| <b>Range</b>                                  | 19.6-66.9         | 19.6-66.9         | 27.8-44.7         |                                     |
| <b>Male n (%)</b>                             | 33 (84.6%)        | 29 (82.9%)        | 4 (100%)          | 0.87                                |
| <b>Post-menopausal women n (%)</b>            | 3 (7.7%)          | 3 (8.6%)          | 0 (0.0%)          | 0.70                                |
| <b>BMI (kg/m<sup>2</sup>)</b>                 | 25.3 [23.1-29.8]  | 25.0 [21.7-28.6]  | 29.3 [21.7-28.2]  | 0.10                                |
| <b>Range</b>                                  | 17.0-35.0         | 17.0 -25.0        | 25.3-33.7         |                                     |
| <b>Moderate-severe TBI</b>                    | 34 (87.2%)        | 30 (85.7%)        | 4 (100%)          | 1.00                                |
| <b>Blast TBI n (%)</b>                        | 13 (33.3%)        | 10 (28.6%)        | 3 (75.0%)         | 0.19                                |
| <b>Time since TBI (months)</b>                | 16.3 [3.6, 24.5]  | 11.4 [3.2, 25.7]  | 26.8 [7.7-34.3]   | 0.38                                |
| <b>Range</b>                                  | 1.5-571.0         | 1.5-571.0         | 3.6-34.5          |                                     |
| <b>Time between scans (months)</b>            | 13.3 [12.1, 14.9] | 13.1 [12.1, 14.5] | 14.6 [10.3-15.1]  | 0.58                                |
| <b>Range</b>                                  | 6.3-24.6          | 6.3-24.6          | 9.1-15.1          |                                     |
| <b>Absolute IGF-1 nmol/L<sup>b</sup></b>      | 23.8 [19.2-29.5]  | 24.2 [19.5, 29.5] | 19.6 [16.7, 23.2] | 0.11                                |
| <b>Range</b>                                  | 12.8-74.5         | 12.8-74.5         | 16.5-23.7         |                                     |
| <b>Age-adjusted IGF-1 ratio</b>               | 1.1 [0.9, 1.2]    | 1.1 [0.9, 1.3]    | 0.9 [0.8-1.0]     | 0.11                                |
| <b>Range</b>                                  | 0.6-3.0           | 0.6-2.9           | 0.8-1.0           |                                     |
| <b>Any structural brain abnormality n (%)</b> | 30 (76.9%)        | 28 (80.0%)        | 2 (50.0%)         | 0.47                                |
| <b>≥ 1 contusion</b>                          | 20 (51.3%)        | 19 (54.3%)        | 1 (25.0%)         | 0.56                                |
| <b>No. of contusions<sup>c</sup></b>          | 1 [0-2]           | 1 [0-2]           | 0 [0-0.8]         | 0.53                                |
| <b>Range</b>                                  | 0-5               | 0-5               | 0-1               |                                     |
| <b>≥ 1 microbleed n (%)</b>                   | 10 (25.6%)        | 10 (28.6%)        | 0 (0.0%)          | 0.53                                |
| <b>Superficial siderosis n (%)</b>            | 13 (33.3%)        | 11 (31.4%)        | 2 (50.0%)         | 0.85                                |
| <b>Diffuse axonal injury (DAI) n (%)</b>      | 5 (12.8%)         | 4 (11.4%)         | 1 (25.0%)         | 1.00                                |

Data given as n (%) or median [IQR] and range (minimum-maximum).

<sup>a</sup> P value for comparison of groups with and without GHD using chi-squared test with Yates' correction for categorical variables and Mann-Whitney U test for continuous variables.

<sup>b</sup> To convert nmol/L to ng/mL divide by 0.131.

<sup>c</sup> including those without any contusions

Supplementary Table 3. Neuropsychological outcome measures in patients after TBI at baseline and recovery over time by IGF-I status.

| Symptom domain                                                    |                                            | Max score | n  | First Visit                 | n  | Second visit              | Effect of Time <sup>a</sup> | Effect of IGF-I Group <sup>a</sup> | Time*Group Interaction <sup>a</sup> |
|-------------------------------------------------------------------|--------------------------------------------|-----------|----|-----------------------------|----|---------------------------|-----------------------------|------------------------------------|-------------------------------------|
| Assessment of GH Deficiency in Adults Quality of Life (AGHDA-QoL) |                                            | 25        | 25 | 9 [2.5-16.5] 0-23           | 25 | 7.0 [1-12.5] 0-22         | 0.99                        | 0.71                               | 0.89                                |
| Beck Depression Inventory II Score (BDI-II)                       |                                            | 63        | 25 | 13.0 [4.0-23.0] 0-27        | 25 | 11.0 [2.5-18.5] 0-32      | 0.46                        | 0.75                               | 0.63                                |
| Epworth Daytime Sleepiness Scale                                  |                                            | 24        | 22 | 3.0 [0.9.5] 0-19            | 15 | 4.0 [1.0-10.0] 0-14       | 0.69                        | 0.45                               | 0.53                                |
| SF-36 QoL                                                         | Physical functioning                       | 100       | 16 | 70.0 [22.5-98.8] 0-100      | 24 | 87.5 [62.3-95.0] 0-100    | 0.32                        | 0.82                               | 0.53                                |
|                                                                   | Role limitations due to physical health    | 100       | 17 | 75.0 [0-100] 0-100          | 24 | 50.0 [6.25-100] 0-100     | 0.58                        | 0.37                               | 0.58                                |
|                                                                   | Role limitations due to emotional problems | 100       | 16 | 100 [66.7-100] 0-100        | 24 | 100 [41.7-100] 0-100      | 0.88                        | 0.59                               | 0.77                                |
|                                                                   | Energy/Fatigue                             | 100       | 16 | 45.0 [45.0-70.0] 15-85      | 24 | 67.5 [47.5-83.8] 5-100    | 0.41                        | 0.41                               | 0.12                                |
|                                                                   | Emotional well being                       | 100       | 16 | 70.0 [54-83.0] 28.0-92.0    | 24 | 80.0 [61.0-92.0] 24.0-100 | 0.52                        | 0.75                               | 0.96                                |
|                                                                   | Social functioning                         | 100       | 17 | 62.5 [50.0-75.0] 12.5-100.0 | 24 | 81.3 [50.0-100] 25-100    | 0.22                        | 0.77                               | 0.87                                |
|                                                                   | Pain                                       | 100       | 17 | 45.0 [39.0-83.8] 22.5-100   | 24 | 77.5 [55.6-100] 42.5-100  | 0.74                        | 0.82                               | 0.93                                |
|                                                                   | General health                             | 100       | 17 | 60.0 [42.5-80.0] 20-100     | 24 | 65.0 [45.0-91.3] 15-100   | 0.27                        | 0.59                               | 0.18                                |
| Cognitive domain                                                  | Cognitive variable                         |           |    |                             |    |                           |                             |                                    |                                     |
| Pre-morbid intelligence: reading ability                          | WTAR raw score                             |           | 32 | 41.0 [35.3-45.0] 0-50       | 32 | 42.0 [31.8-46.8] 9-50     | 0.88                        | 0.83                               | 0.60                                |
| Intellectual ability                                              | WASI similarities (verbal)                 |           | 33 | 36.0 [32.5-38.0] 21-46      | 33 | 39.0 [35.5-41.0] 23-46    | 0.61                        | 0.96                               | 0.42                                |
|                                                                   | WASI matrix reasoning (non-verbal)         |           | 32 | 26.5 [20.5-30.0] 9-34       | 32 | 28.5 [25.3-30.8] 12-35    | 0.08                        | 1.00                               | 0.20                                |
| Memory: associative memory                                        | People test (total score)                  |           | 33 | 22.0 [14.5-29.0] 4-38       | 33 | 27.0 [18.0-31.0] 6-38     | <b>0.010</b>                | 0.19                               | 0.78                                |
| Memory: immediate recall                                          | Logical memory I Total                     |           | 33 | 28.0 [20.5-32.0] 10-40      | 33 | 43.0 [33.0-51.5] 19-62    | 0.26                        | 0.12                               | <b>0.046</b>                        |
|                                                                   | Logical memory II Total                    |           | 33 | 26.0 [18.5-32.5] 0-42       | 33 | 27.0 [19.5-33.0] 10-43    | 0.63                        | 0.20                               | 0.57                                |
| Memory: delayed recall                                            | Logical memory retention                   |           | 32 | 86.7 [78.9-94.3] 33.3-107.7 | 33 | 90.3 [82.9-98.0] 45-190   | 0.41                        | 0.34                               | 0.93                                |
| Processing speed: visual search/complex                           | Trail Making Test Trail A (s)              |           | 32 | 26.0 [21.0-32.0] 14-67      | 33 | 22.0 [16.5-28.5] 13-87    | 0.82                        | 0.60                               | 0.65                                |
|                                                                   | Trail Making Test Trail B (s)              |           | 32 | 52.0 [43.3-68.5] 22-192     | 33 | 47.0 [30.5-71.0] 25-166   | 0.62                        | 0.32                               | 0.81                                |
| Processing speed: naming/reading                                  | Stroop Colour Naming (s)                   |           | 31 | 32.0 [28.0-41.0] 20-101     | 33 | 32.0 [30.0-35.0] 19-51    | 0.56                        | 0.90                               | 0.96                                |
|                                                                   | Stroop Word Reading (s)                    |           | 31 | 23.0 [19.0-32.0] 15-62      | 32 | 23.0 [20.0-25.8] 14-43    | 0.53                        | 0.25                               | 0.34                                |
| Executive function: alternating-switch cost                       | Trail Making Test Trail B minus A (s)      |           | 32 | 22.5 [13.0-38.8] 4-125      | 33 | 19.0 [15.0-42.5] 7-102    | 0.57                        | 0.24                               | 0.62                                |
| Cognitive flexibility                                             | Color Word Stroop Inhibition/switching (s) |           | 32 | 66.0 [55.5-76.5] 38-128     | 33 | 57.0 [51.5-66.5] 37-119   | <b>0.003</b>                | 0.33                               | 0.50                                |
| Word generation fluency                                           | DKEFS Letter Fluency F+A+S total           |           | 33 | 36.0 [27.0-45.0] 11-65      | 33 | 41.0 [35.5-48.5] 15-60    | 0.15                        | 0.57                               | 0.59                                |

<sup>a</sup> corrected for all covariates (time since injury, time between scans, gender, age at first scan, TBI severity)

Data displayed as median, [IQR], range.

Note: AGHDA, BDI-II, Epworth: higher score equals worse symptoms; SF-36: lower score equals worse quality of life; WTAR, Similarities, Matrix reasoning, People test, Logical memory: higher score equals better performance; Trail-making, Stroop, letter fluency: lower score equals better cognition.

Abbreviations: DKEFS, Delis-Kaplan executive function system; (s), seconds; SF-36, Short Form 36 Health Survey; WASI, Wechsler Adult Intelligence Scale; WTAR, Wechsler Test of Adult Reading.
